# Supplementary material
Source: PubMed Central journal article supplement (PMC6911634)

Supplemental Figure 1. Plots of individual methylated DNA marker level distributions with respect to control versus case, further divided by stage. Spearman's correlation coefficients and p-values are shown for each marker.

### ARHGEF4

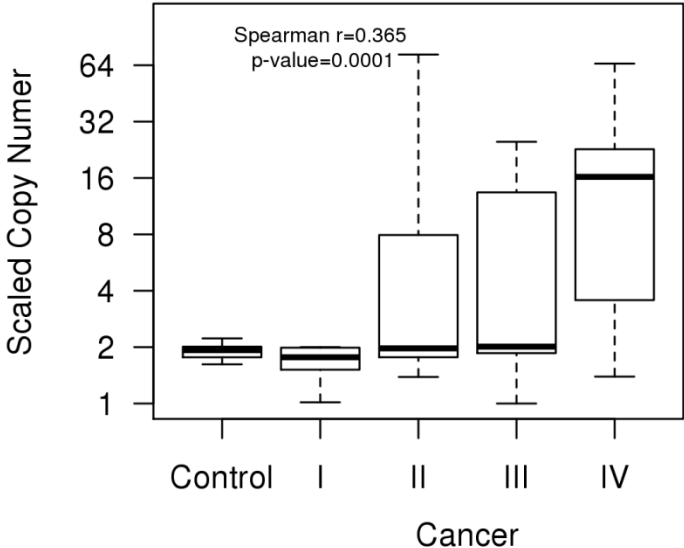

### BMP3

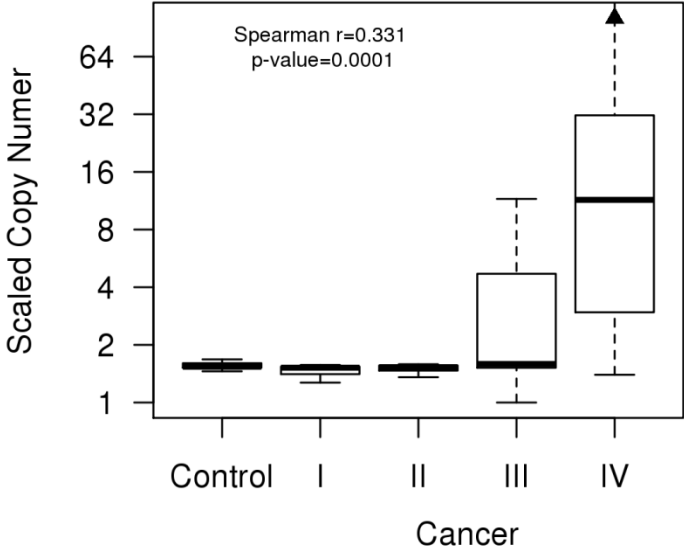

### DMRTA2

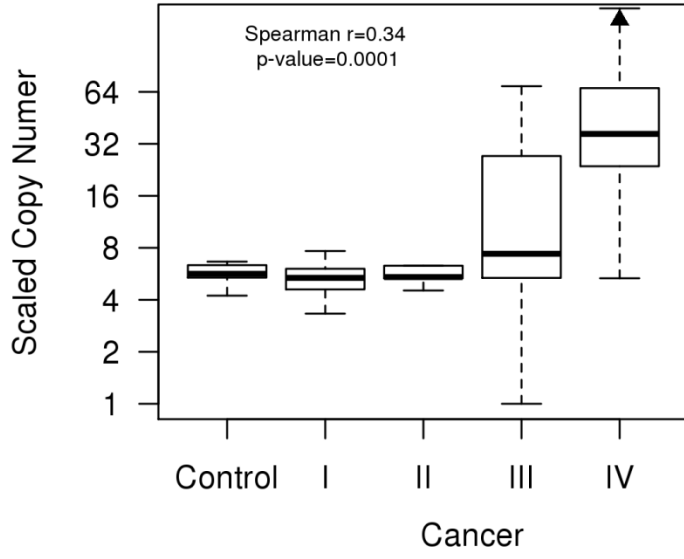

### ELMO1

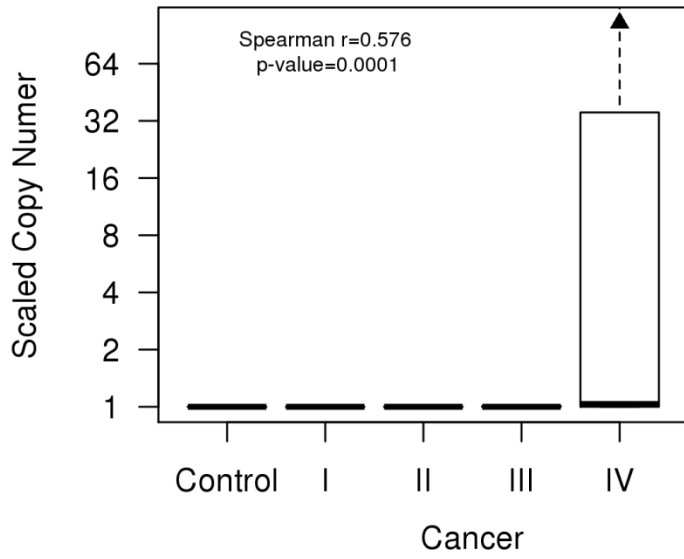

### FER1L4

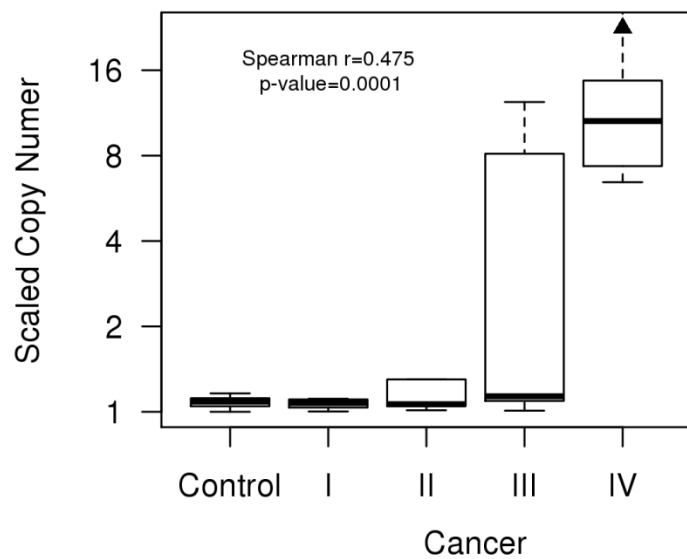

### IKZF1

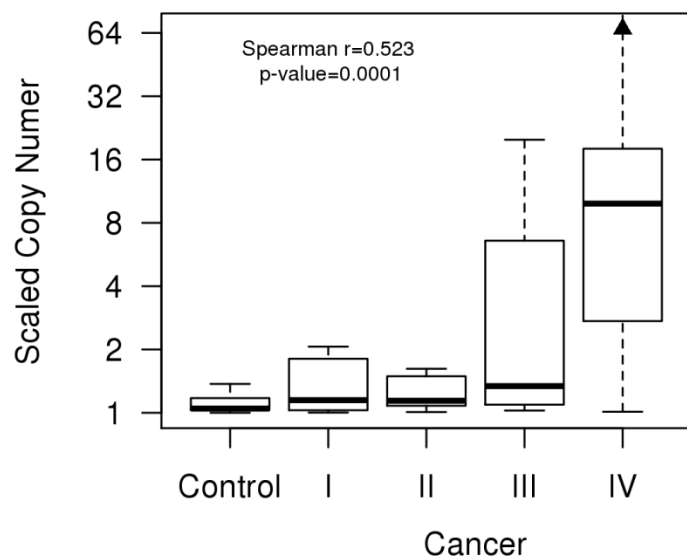

### NDRG4

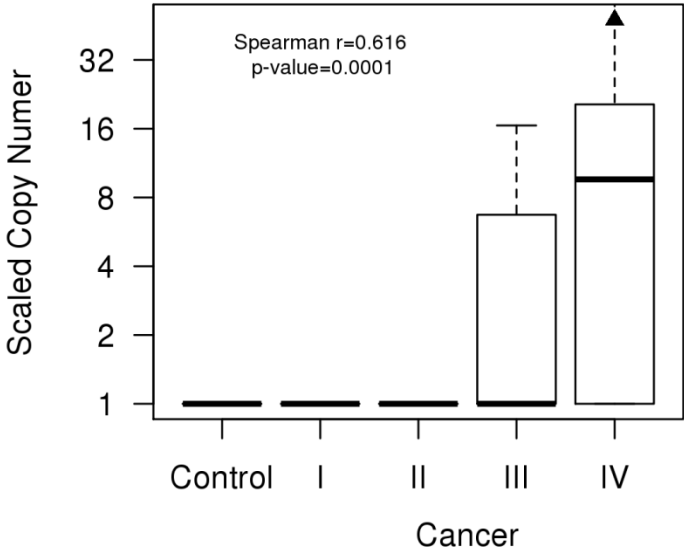

### OPLAH

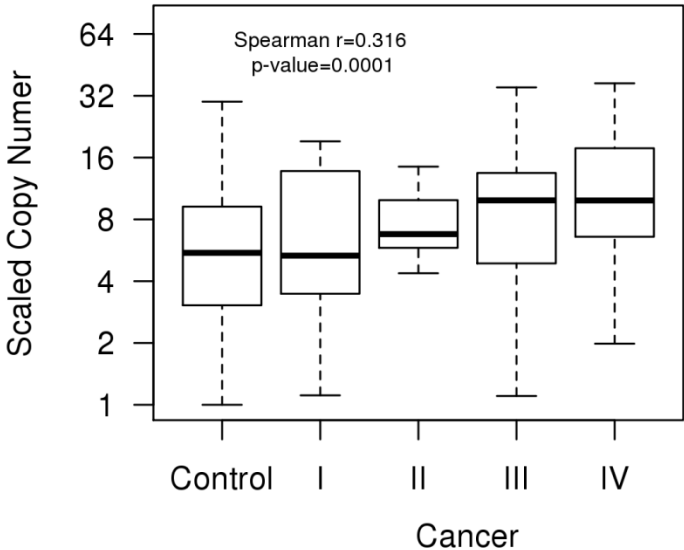

### ST8SIA1

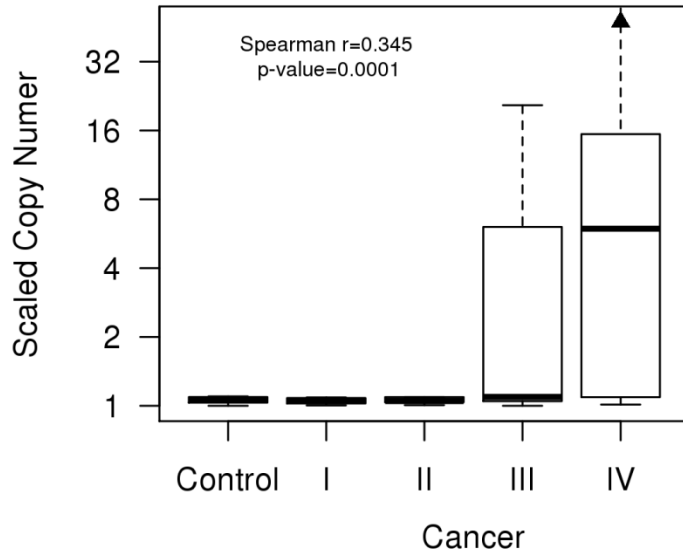

### TBX15

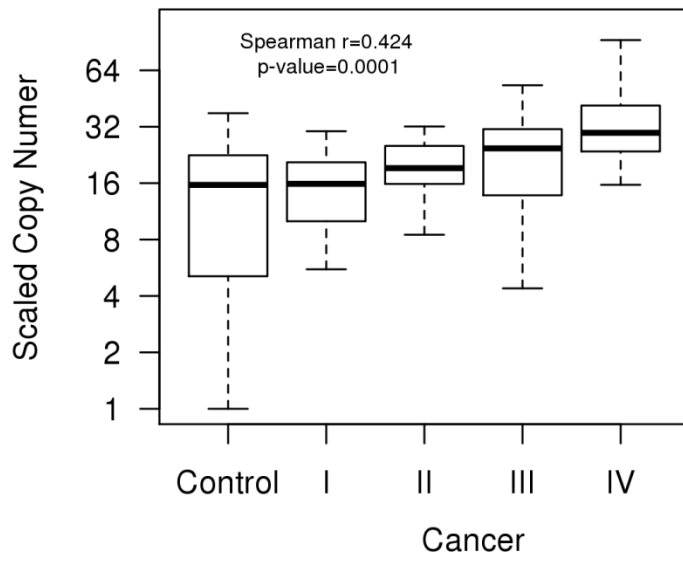

## TSPYL5

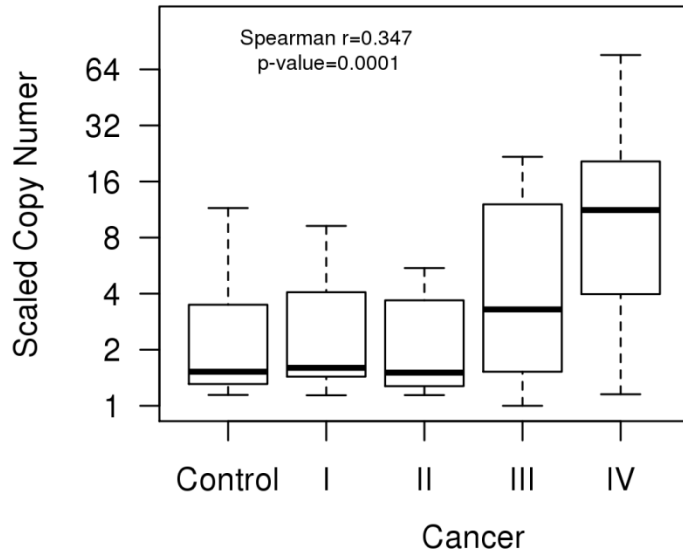

## ZNF671

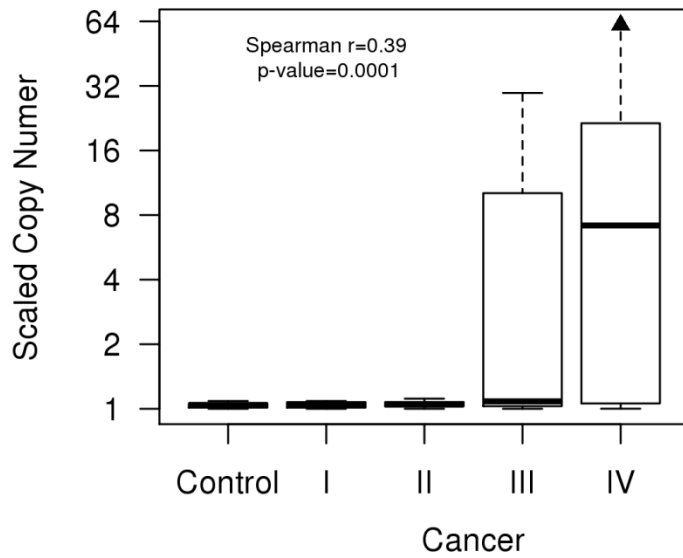

Supplement: NIHMS1540205-supplement-2.pdf [file NIHMS1540205-supplement-2.pdf]
